# Supplementary material
Source: Springer Nature journal article supplement (https://www.springermedizin.de/resource/supplementary/12871_2014_326_MOESM5_ESM.pdf/9429108)

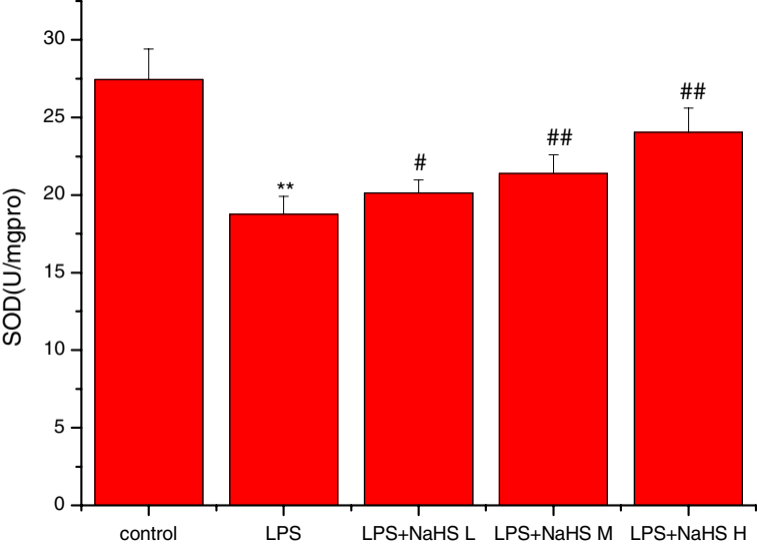

Supplement: MOESM5 [file 9429108]
